# Supplementary material for: Beating Poisson stochastic particle encapsulation in flow-focusing microfluidic devices using viscoelastic liquids
Source: Royal Society of Chemistry journal article supplement (doi:10.1039/d2sm00935h), 2022-01-01
Supplement: d2sm00935h1.pdf [file d2sm00935h1.pdf]

Supplemental Material

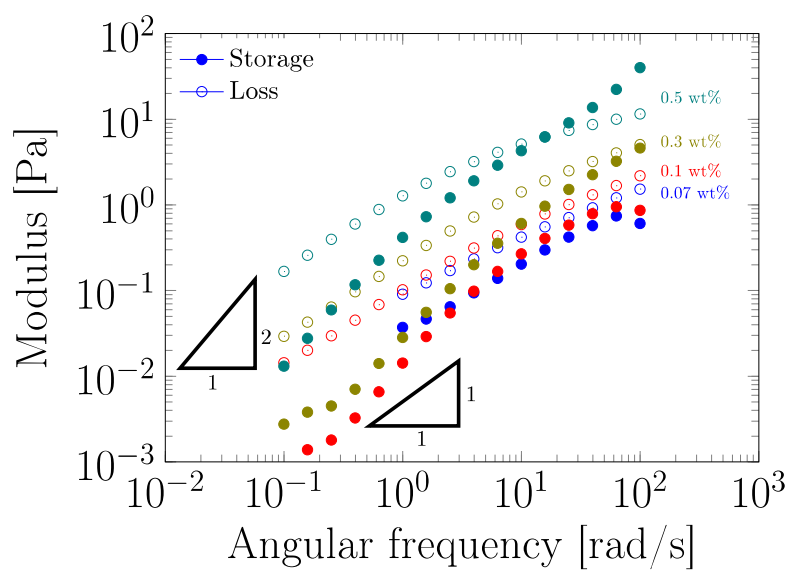

Fig. S1: Storage and loss modulus obtained via small amplitude oscillatory shear tests with an imposed deformation of 5%. The two slopes represent the scalings for the storage ( $\propto \omega^2$ ) and loss modulus ( $\propto \omega$ ) in the terminal region.
